# Supplementary material for: The Cardiotonic Steroid Marinobufagenin Is a Predictor of Increased Left Ventricular Mass in Obesity: The African-PREDICT Study
Source: PubMed Central journal article supplement (PMC7603247; doi:10.3390/nu12103185), 2020-10-18
Supplement: nutrients-12-03185-s001.pdf [file nutrients-12-03185-s001.pdf]

## Supplementary Tables

**TABLE S1. Characteristics of 275 participants followed over 4.5 years compared with 927 participants from the African-PREDICT cohort.**

|                                            | Participants<br>included in this<br>sub study<br>N=275 | Participants<br>from African-<br>PREDICT<br>cohort not<br>included in<br>analyses<br>N=927 | Mean difference<br>(95% CI of diff.) | P                |
|--------------------------------------------|--------------------------------------------------------|--------------------------------------------------------------------------------------------|--------------------------------------|------------------|
| Men, N (%)                                 | 125 (45.5)                                             | 453 (48.9)                                                                                 |                                      | 0.32             |
| Black, N (%)                               | 138 (50.2)                                             | 469 (50.6)                                                                                 |                                      | 0.91             |
| Age (years)                                | 25.4 ± 3.16                                            | 24.3 ± 3.06                                                                                | -1.11 (-1.53; -0.70)                 | <b>&lt;0.001</b> |
| <b>Anthropometric measurements</b>         |                                                        |                                                                                            |                                      |                  |
| Height (cm)                                | 168 ± 9.23                                             | 168 ± 9.60                                                                                 | 0.10 (-1.19; 1.38)                   | 0.88             |
| Weight (kg)                                | 73.3 ± 18.3                                            | 70.6 ± 17.0                                                                                | -2.76 (-5.09; -0.43)                 | <b>0.020</b>     |
| BMI (kg/m <sup>2</sup> )                   | 25.8 ± 5.79                                            | 24.8 ± 5.43                                                                                | -0.99 (-1.74; 0.25)                  | <b>0.009</b>     |
| <b>Frequency of obesity based on:</b>      |                                                        |                                                                                            |                                      |                  |
| BMI ≥ 30 kg/m <sup>2</sup> , N (%)         | 60 (21.8)                                              | 136 (14.7)                                                                                 |                                      | <b>0.005</b>     |
| <b>Blood pressure</b>                      |                                                        |                                                                                            |                                      |                  |
| Clinic SBP (mmHg)                          | 120 ± 12.4                                             | 119 ± 12.0                                                                                 | -0.93 (-2.56; 0.69)                  | 0.26             |
| Clinic DBP (mmHg)                          | 78.9 ± 8.07                                            | 78.4 ± 7.85                                                                                | -0.63 (-1.69; 0.44)                  | 0.25             |
| <b>Echocardiography</b>                    |                                                        |                                                                                            |                                      |                  |
| LVMi (g/m <sup>2</sup> )                   | 70.7 ± 15.7                                            | 74.0 ± 18.6                                                                                | 2.93 (0.66; 5.22)                    | <b>0.012</b>     |
| <b>Urinary profile</b>                     |                                                        |                                                                                            |                                      |                  |
| 24hr MBG excretion (nmol/day)              | 3.38 (1.12; 9.13)                                      | 3.32 (1.06; 9.30)                                                                          |                                      | 0.70             |
| Estimated salt intake (g/day) <sup>†</sup> | 7.73 (2.80; 19.4)                                      | 7.76 (2.55; 20.3)                                                                          |                                      | 0.92             |

Data presented as mean ± SD and geometric mean (5<sup>th</sup> and 95<sup>th</sup> percentiles)

<sup>†</sup> Estimated salt intake based on 24hr sodium excretion

BMI, body mass index; DBP, diastolic blood pressure; LVMi, left ventricular mass index; MBG, marinobufagenin

**TABLE S2A. Characteristics of 215 participants with a BMI < 30kg/m<sup>2</sup> (non-obese) followed over 4.5 years.**

|                                    | <b>Baseline</b>   | <b>Follow-up</b>  | <b>Difference</b>    | <b>P</b> |
|------------------------------------|-------------------|-------------------|----------------------|----------|
| Men, N (%)                         | 101 (47.0)        | 101 (47.0)        |                      |          |
| Black, N (%)                       | 110 (51.2)        | 110 (51.2)        |                      |          |
| Age (years)                        | 25.3 ± 3.16       | 29.9 ± 3.23       | 4.57 (4.45; 4.69)    | <0.001   |
| <b>Anthropometric measurements</b> |                   |                   |                      |          |
| Height (m)                         | 1.69 ± 0.09       | 1.69 ± 0.09       | 0.00 (-0.001; 0.001) | 0.92     |
| Weight (kg)                        | 66.7 ± 12.5       | 71.1 ± 15.2       | 4.46 (3.17; 5.75)    | <0.001   |
| Waist circumference (cm)           | 76.3 ± 9.43       | 78.2 ± 10.4       | 1.88 (1.13; 2.63)    | <0.001   |
| BMI (kg/m <sup>2</sup> )           | 23.4 ± 3.32       | 27.8 ± 4.36       | 1.42 (1.10; 1.73)    | <0.001   |
| WHtR                               | 0.45 ± 0.05       | 0.46 ± 0.06       | 0.01 (0.01; 0.02)    | <0.001   |
| <b>Blood pressure</b>              |                   |                   |                      |          |
| Clinic SBP (mmHg)                  | 119 ± 12.6        | 115 ± 12.6        | -3.84 (-5.14; -2.55) | <0.001   |
| Clinic DBP (mmHg)                  | 78.5 ± 8.07       | 78.6 ± 9.18       | 0.13 (-0.89; 1.15)   | 0.81     |
| Central SBP (mmHg)                 | 108 ± 9.40        | 109 ± 10.2        | 0.40 (-0.67; 1.48)   | 0.46     |
| Hypertension, N (%) <sup>#</sup>   | 27 (12.6)         | 29 (13.5)         |                      | 0.86     |
| <b>Echocardiography</b>            |                   |                   |                      |          |
| LVMi (g/m <sup>2</sup> )           | 70.5 ± 15.9       | 76.3 ± 18.3       | 5.81 (3.67; 7.95)    | <0.001   |
| IVS <sub>d</sub> (cm/m)            | 0.46 ± 0.10       | 0.52 ± 0.09       | 0.05 (0.04; 0.07)    | <0.001   |
| LVID <sub>d</sub> (cm/m)           | 2.80 ± 0.24       | 2.75 ± 0.23       | -0.06 (-0.08; -0.03) | <0.001   |
| PWT <sub>d</sub> (cm/m)            | 0.48 ± 0.08       | 0.53 ± 0.09       | 0.04 (0.03; 0.06)    | <0.001   |
| EDVi (mL/m)                        | 61.9 ± 12.8       | 58.7 ± 12.8       | -3.14 (-4.48; -1.80) | <0.001   |
| SVi (ml/m <sup>2.04</sup> )        | 24.2 ± 5.22       | 22.6 ± 4.82       | -1.69 (-2.30; -1.07) | <0.001   |
| <b>Urinary profile</b>             |                   |                   |                      |          |
| eGFR (ml/min/1.73m <sup>2</sup> )  | 111 ± 16.9        | 108 ± 16.9        | -3.09 (-5.07; -1.12) | 0.002    |
| MBG exc. (nmol/day)                | 3.34 (1.12; 9.13) |                   |                      |          |
| Estimated NaCl intake (g/day)      | 7.63 (2.80; 20.0) | 7.10 (1.62; 22.8) | -0.29 (9.15)         | 0.60     |
| <b>Biochemical profile</b>         |                   |                   |                      |          |
| Glucose (mmol/L)                   | 4.59 ± 0.79       | 4.01 ± 0.65       | -0.58 (-0.71; -0.45) | <0.001   |
| HDL-C (mmol/L)                     | 1.39 ± 0.41       | 1.30 ± 0.34       | -0.10 (-0.13; -0.06) | <0.001   |
| LDL-C (mmol/L)                     | 2.70 ± 0.90       | 2.56 ± 0.85       | -0.14 (-0.23; -0.04) | 0.006    |
| C-reactive protein (mg/L)          | 0.80 (0.10; 6.15) | 0.86 (0.14; 7.77) | 0.00 (1.17)          | 0.27     |
| γ-glutamyl transferase (U/L)       | 21.0 (8.76; 64.3) | 20.1 (7.22; 62.4) | -0.37 (8.16)         | 0.30     |

Data presented as mean ± SD and geometric mean (5<sup>th</sup> and 95<sup>th</sup> percentiles)

Difference from baseline to follow up represented as mean (95% CI) for normally distributed data and median (IQR) for non-parametric data

<sup>#</sup> Hypertension: Clinic SBP ≥ 140mmHg/DBP ≥ 90mmHg

BMI, body mass index; DBP, diastolic blood pressure; EDVi, end diastolic volume index; eGFR: estimated glomerular filtration rate; HDL-C: high density lipoprotein cholesterol; IVS<sub>d</sub>: interventricular septum at end-diastole; LDL-C: low density lipoprotein cholesterol; LVID<sub>d</sub>: LV internal diameter at end-diastole; LVMi, left ventricular mass index; MBG, marinobufagenin; PWT<sub>d</sub>: posterior wall thickness at end-diastole SBP, systolic blood pressure; SVi, stroke volume index; WC, waist circumference; WHtR, waist/height ratio

**TABLE S2B. Characteristics of 60 participants with a BMI  $\geq 30\text{kg/m}^2$  (obese) followed over 4.5 years.**

|                                      | <b>Baseline</b>   | <b>Follow-up</b>  | <b>Difference</b>     | <b>P</b>         |
|--------------------------------------|-------------------|-------------------|-----------------------|------------------|
| Men, N (%)                           | 24 (40.0)         | 24 (40.0)         |                       |                  |
| Black, N (%)                         | 28 (46.7)         | 28 (46.7)         |                       |                  |
| Age (years)                          | 25.8 $\pm$ 3.18   | 30.4 $\pm$ 3.15   | 4.68 (4.48; 4.89)     | <b>&lt;0.001</b> |
| <b>Anthropometric measurements</b>   |                   |                   |                       |                  |
| Height (m)                           | 1.67 $\pm$ 0.09   | 1.67 $\pm$ 0.09   | 0.001 (-0.002; 0.003) | 0.57             |
| Weight (kg)                          | 97.1 $\pm$ 15.9   | 102 $\pm$ 16.9    | 5.30 (2.90; 7.69)     | <b>&lt;0.001</b> |
| Waist circumference (cm)             | 100 $\pm$ 12.7    | 101 $\pm$ 12.8    | 0.87 (-1.35; 3.09)    | 0.44             |
| BMI (kg/m <sup>2</sup> )             | 34.4 $\pm$ 4.34   | 36.3 $\pm$ 5.21   | 1.86 (1.00; 2.72)     | <b>&lt;0.001</b> |
| WHtR                                 | 0.60 $\pm$ 0.07   | 0.60 $\pm$ 0.07   | 0.005 (-0.01; 0.02)   | 0.42             |
| <b>Blood pressure</b>                |                   |                   |                       |                  |
| Clinic SBP (mmHg)                    | 124 $\pm$ 10.5    | 121 $\pm$ 12.3    | -3.47 (-6.56; -0.38)  | <b>0.029</b>     |
| Clinic DBP (mmHg)                    | 80.8 $\pm$ 7.90   | 81.7 $\pm$ 10.1   | 0.93 (-1.39; 3.26)    | 0.43             |
| Central SBP (mmHg)                   | 113 $\pm$ 8.90    | 116 $\pm$ 9.54    | 2.58 (0.17; 4.99)     | <b>0.037</b>     |
| Hypertension, N (%) <sup>#</sup>     | 12 (20.0)         | 13 (21.7)         |                       | 1.00             |
| <b>Echocardiography</b>              |                   |                   |                       |                  |
| LVMi (g/m <sup>2</sup> )             | 71.7 $\pm$ 15.1   | 83.1 $\pm$ 19.2   | 11.3 (6.43; 16.2)     | <b>&lt;0.001</b> |
| IVS <sub>d</sub> (cm/m)              | 0.50 $\pm$ 0.10   | 0.59 $\pm$ 0.09   | 0.09 (0.06; 0.11)     | <b>&lt;0.001</b> |
| LVID <sub>d</sub> (cm/m)             | 2.99 $\pm$ 0.23   | 2.89 $\pm$ 0.21   | -0.10 (-0.16; -0.04)  | <b>0.002</b>     |
| PWT <sub>d</sub> (cm/m)              | 0.54 $\pm$ 0.09   | 0.60 $\pm$ 0.10   | 0.06 (0.03; 0.10)     | <b>&lt;0.001</b> |
| EDVi (mL/m)                          | 71.5 $\pm$ 14.3   | 65.8 $\pm$ 12.0   | -5.68 (-8.77; -2.59)  | <b>0.001</b>     |
| SVi (ml/m <sup>2.04</sup> )          | 28.3 $\pm$ 5.41   | 25.1 $\pm$ 5.00   | -3.24 (-4.72; -1.75)  | <b>&lt;0.001</b> |
| <b>Urinary profile</b>               |                   |                   |                       |                  |
| eGFR (ml/min/1.73m <sup>2</sup> )    | 111 $\pm$ 15.1    | 107 $\pm$ 15.2    | -3.33 (-7.26; 0.59)   | 0.095            |
| MBG exc. (nmol/day)                  | 3.52 (0.93; 9.34) |                   |                       |                  |
| Estimated NaCl intake (g/day)        | 8.09 (2.57; 19.3) | 7.27 (1.30; 28.0) | 1.08 (12.7)           | 0.66             |
| <b>Biochemical profile</b>           |                   |                   |                       |                  |
| Glucose (mmol/L)                     | 4.79 $\pm$ 0.66   | 4.36 $\pm$ 0.54   | -0.43 (-0.63; -0.24)  | <b>&lt;0.001</b> |
| HDL-C (mmol/L)                       | 1.14 $\pm$ 0.27   | 1.09 $\pm$ 0.25   | -0.05 (-0.10; 0.01)   | 0.087            |
| LDL-C (mmol/L)                       | 3.18 $\pm$ 0.89   | 3.01 $\pm$ 1.02   | -0.17 (-0.33; -0.01)  | <b>0.041</b>     |
| C-reactive protein (mg/L)            | 2.80 (0.47; 60.9) | 2.40 (0.23; 15.5) | 0.06 (4.55)           | 0.51             |
| $\gamma$ -glutamyl transferase (U/L) | 25.4 (8.37; 60.9) | 26.8 (7.12; 138)  | -1.37 (14.6)          | 0.73             |

Data presented as mean  $\pm$  SD and geometric mean (5<sup>th</sup> and 95<sup>th</sup> percentiles)

Difference from baseline to follow up represented as mean (95% CI) for normally distributed data and median (IQR) for non-parametric data

<sup>#</sup> Hypertension: Clinic SBP  $\geq 140\text{mmHg}$ /DBP  $\geq 90\text{mmHg}$

BMI, body mass index; DBP, diastolic blood pressure; EDVi, end diastolic volume index; eGFR: estimated glomerular filtration rate; HDL-C: high density lipoprotein cholesterol; IVS<sub>d</sub>: interventricular septum at end-diastole; LDL-C: low density lipoprotein cholesterol; LVID<sub>d</sub>: LV internal diameter at end-diastole; LVMi, left ventricular mass index; MBG, marinobufagenin; PWT<sub>d</sub>: posterior wall thickness at end-diastole SBP, systolic blood pressure; SVi, stroke volume index; WC, waist circumference; WHtR, waist/height ratio

**TABLE S3. Multiple regression analyses with follow-up LVMI and percentage change in LVMI as dependent variables and baseline MBG excretion as the main independent variable.**

| Dependent variable                                                          | MBG excretion (nmol/day)                       |              |          |                                                 |              |              |                                           |              |              |
|-----------------------------------------------------------------------------|------------------------------------------------|--------------|----------|-------------------------------------------------|--------------|--------------|-------------------------------------------|--------------|--------------|
|                                                                             | Normal<br>18.6-24.9 kg/m <sup>2</sup><br>N=123 |              |          | Overweight<br>25-29.9 kg/m <sup>2</sup><br>N=73 |              |              | Obese<br>BMI>30 kg/m <sup>2</sup><br>N=56 |              |              |
|                                                                             | Adj<br>R <sup>2</sup>                          | Std. $\beta$ | <i>P</i> | Adj<br>R <sup>2</sup>                           | Std. $\beta$ | <i>P</i>     | Adj<br>R <sup>2</sup>                     | Std. $\beta$ | <i>P</i>     |
| LVMI (g/m <sup>2</sup> )                                                    | 0.37                                           | NS           |          | 0.44                                            | NS           |              | 0.35                                      | 0.311        | <b>0.007</b> |
| % $\Delta$ LVMI                                                             | 0.19                                           | NS           |          | 0.29                                            | -0.190       | 0.074        | 0.40                                      | 0.336        | <b>0.003</b> |
| <i>Sensitivity analysis additionally adjusted for estimated salt intake</i> |                                                |              |          |                                                 |              |              |                                           |              |              |
| LVMI (g/m <sup>2</sup> )                                                    | 0.37                                           | NS           |          | 0.44                                            | NS           |              | 0.35                                      | 0.311        | <b>0.008</b> |
| % $\Delta$ LVMI                                                             | 0.19                                           | NS           |          | 0.29                                            | -0.190       | 0.074        | 0.40                                      | 0.337        | <b>0.003</b> |
| <i>Sensitivity analysis additionally adjusted for estradiol</i>             |                                                |              |          |                                                 |              |              |                                           |              |              |
| LVMI (g/m <sup>2</sup> )                                                    | 0.39                                           | NS           |          | 0.46                                            | NS           |              | 0.47                                      | 0.305        | <b>0.007</b> |
| % $\Delta$ LVMI                                                             | 0.22                                           | NS           |          | 0.32                                            | -0.221       | <b>0.035</b> | 0.50                                      | 0.344        | <b>0.002</b> |

Adjusted for sex, ethnicity, age, clinic SBP, eGFR, glucose, HDL, CRP, GGT and baseline LVMI. NS refers to  $P > 0.05$ .

**TABLE S4: Backward stepwise regression model with obesity defined according to BMI, WC and WHtR criteria**

|                                   | Dependent variables      |       |          |        |
|-----------------------------------|--------------------------|-------|----------|--------|
|                                   | LVMi (g/m <sup>2</sup> ) |       | % Δ LVMi |        |
| <b>Obese; N=51</b>                |                          |       |          |        |
| Adj R <sup>2</sup>                | 0.36                     |       | 0.37     |        |
| <b>Independent variables</b>      | Std. β                   | P     | Std. β   | P      |
| MBG excretion (nmol/day)          | 0.310                    | 0.009 | 0.350    | 0.003  |
| Glucose (mmol/L)                  | 0.270                    | 0.028 | 0.288    | 0.019  |
| Baseline LVMi (g/m <sup>2</sup> ) | 0.353                    | 0.005 | -0.570   | <0.001 |

Adjusted for sex, ethnicity, age, clinic SBP, eGFR, glucose, HDL, CRP, GGT and baseline LVMi

\*Obesity: BMI >30 kg/m<sup>2</sup> and WC >94cm for white men; >81.2cm for black men; >80cm for white women and >81cm for black women and WHtR >0.5

**TABLE S5. Backward stepwise multiple regression analyses with follow-up LVMI and percentage change in LVMI as dependent variables, and baseline estimated NaCl intake as the main independent variable.**

| Dependent variables      | Estimated NaCl intake (g/day)                  |              |          |                                                 |              |          |                                           |              |          |
|--------------------------|------------------------------------------------|--------------|----------|-------------------------------------------------|--------------|----------|-------------------------------------------|--------------|----------|
|                          | Normal<br>18.6-24.9 kg/m <sup>2</sup><br>N=123 |              |          | Overweight<br>25-29.9 kg/m <sup>2</sup><br>N=73 |              |          | Obese<br>BMI>30 kg/m <sup>2</sup><br>N=56 |              |          |
|                          | Adj<br>R <sup>2</sup>                          | Std. $\beta$ | <i>P</i> | Adj<br>R <sup>2</sup>                           | Std. $\beta$ | <i>P</i> | Adj<br>R <sup>2</sup>                     | Std. $\beta$ | <i>P</i> |
| LVMI (g/m <sup>2</sup> ) | 0.37                                           | NS           |          | 0.44                                            | NS           |          | 0.31                                      | NS           |          |
| % $\Delta$ LVMI*         | 0.19                                           | NS           |          | 0.27                                            | NS           |          | 0.32                                      | 0.202        | 0.090    |

Adjusted for sex, ethnicity, age, clinic SBP, eGFR, glucose, HDL, CRP, GGT and baseline LVMI

**TABLE S6: Estradiol levels of men and women in the African-PREDICT study**

|                      | <b>Men</b>        | <b>Women</b>     | <b>P</b>         |
|----------------------|-------------------|------------------|------------------|
| <b>Total group</b>   | N=122             | N=140            |                  |
| Estradiol (pg/ml)    | 37.0 (21.6; 66.7) | 54.2 (6.44; 305) | <b>&lt;0.001</b> |
| <b>Normal weight</b> | N=58              | N=62             |                  |
| Estradiol (pg/ml)    | 40.7 (21.3; 72.2) | 59.0 (6.38; 299) | <b>0.019</b>     |
| <b>Overweight</b>    | N=35              | N=39             |                  |
| Estradiol (pg/ml)    | 32.5 (19.5; 51.2) | 46.2 (6.09; 254) | 0.055            |
| <b>Obese</b>         | N=23              | N=31             |                  |
| Estradiol (pg/ml)    | 34.6 (21.7; 46.1) | 57.6 (15.0; 426) | <b>0.006</b>     |

**TABLE S7: Pearson correlations between the percentage change in LVMI and estradiol in men and women**

|                      | % change LVMI    |                   |
|----------------------|------------------|-------------------|
|                      | Men              | Women             |
| <b>Total group</b>   |                  |                   |
| Estradiol (pg/ml)    | r=0.009; p=0.92  | r=-0.032; p=0.71  |
| <b>Normal weight</b> |                  |                   |
| Estradiol (pg/ml)    | r=0.183; p=0.17  | r=0.236; p=0.065  |
| <b>Overweight</b>    |                  |                   |
| Estradiol (pg/ml)    | r=-0.054; p=0.76 | r=-0.316; p=0.050 |
| <b>Obese</b>         |                  |                   |
| Estradiol (pg/ml)    | r=-0.313; p=0.15 | r=-0.303; p=0.098 |
